# Supplementary material
Source: publisher site journal article supplement (https://www.dovepress.com/article/299005)
Supplement: Supplementary file 1 [file get_supplementary_file.php]

# **Supplementary materials**

# **Supplementary Table 1.** Target prescription oral drugs for patients with bipolar disorder.

| **Drug category** | **ATC code** | **ATC**  **(small classification)** | **General name** |
| --- | --- | --- | --- |
| Mood stabilizer | N03A | Anti-epileptics | Carbamazepine, Sodium valproate, Lamotrigine |
|  | N06A3 | Mood stabilisers | Lithium carbonate |
| Atypical antipsychotics | N05A1 | Atypical antipsychotics | Aripiprazole, Asenapine maleate, Olanzapine, Quetiapine fumarate, Clozapine, Zotepine, Paliperidone, Brexpiprazole, Blonanserin, Perospirone Hydrochloride hydrate, Risperidone |
| Typical antipsychotic | A02B9 | All other antiulcerants | Sulpiride |
|  | C02B2 | Antihypertensive-diuretic combinations, mainly peripherally acting | Reserpine, Hydralazine hydrochloride, Hydrochlorothiazide |
|  | C02C | Rauwolfia alkaloids and other antihypertensives of herbal origin | Reserpine |
|  | C02D | Rauwolfia alkaloids and other antihypertensives of herbal origin in combination with diuretics | Benzylhydrochlorothiazide, Reserpine, Carbazochrome |
|  | N05A9 | Conventional antipsychotics | Oxypertine, Carpipramine maleate, Carpipramine hydrochloride hydrate, Clocapramine hydrochloride hydrate, Chlorpromazine hibenzate, Chlorpromazine phenolphthalinate, Chlorpromazine hydrochloride, Chlorpromazine hydrochloride, Promethazine hydrochloride, Phenobarbital, Spiperone, Sultopride hydrochloride, Sulpiride, Thioridazine, Timiperone, Trifloperazine maleate, Nemonapride, Haloperidol, Pipamperone hydrochloride, Pimozide, Fluphenazine maleate, Bromperidol, Prochlorperazine maleate, Propericiazine, Perphenazine, Mosapramine hydrochloride, Moperone hydrochloride, Levomepromazine maleate |

# **Supplementary Table 2.** Target prescription oral drugs for patients with schizophrenia.

| **Drug category** | **ATC code** | **General name** |
| --- | --- | --- |
| Atypical antipsychotics | N05A1 | Aripiprazole, Asenapine maleate, Olanzapine, Quetiapine fumarate, Clozapine, Zotepine, Paliperidone, Brexpiprazole, Blonanserin, Perospirone hydrochloride hydrate, Risperidone |
| Conventional antipsychotics | N05A9 | Oxypertine, Carpipramine maleate, Carpipramine hydrochloride hydrate, Clocapramine hydrochloride hydrate, Chlorpromazine hibenzate, Chlorpromazine phenolphthalinate, Chlorpromazine hydrochloride, Promethazine hydrochloride, Phenobarbital, Spiperone, Sultopride hydrochloride, Sulpiride, Thioridazine, Timiperone, Trifloperazine maleate, Nemonapride, Haloperidol, Pipamperone hydrochloride, Pimozide, Fluphenazine maleate, Bromperidol, Prochlorperazine maleate, Propericiazine, Perphenazine, Mosapramine Hydrochloride, Moperone hydrochloride, Levomepromazine maleate |
| All other antiulcerants | A02B9 | Sulpiride |
| Antihypertensive-diuretic combinations, mainly peripherally acting | C02B2 | Reserpine, Hydralazine hydrochloride, Hydrochlorothiazide |
| Rauwolfia alkaloids and other antihypertensives of herbal origin | C02C | Reserpine |
| Rauwolfia alkaloids and other antihypertensives of herbal origin in combination with diuretics | C02D | Benzylhydrochlorothiazide, Reserpine, Carbazochrome |

# **Supplementary Table 3.** Definition of a leave of absence and blood tests.

A leave of absence:

180000710, B012, written opinion delivery fee on injury and illness benefits.

Blood tests:

[B001] specified drug monitoring fee [1]; or

[B001] specified drug monitoring fee [the fourth month or later].

# **Supplementary Table 4.** Treatment patterns of prescribed drugs in patients with schizophrenia during the first, second, and third year of follow-up.

|  | **First year (*n* = 23,396)** | **Second year (*n* = 10,283)** | **Third year (*n* = 5,773)** |
| --- | --- | --- | --- |
| Prescription, n (%) | | | |
| Benzodiazepine drugs, yes | 14,239 (60.9) | 7,689 (74.8) | 4,560 (79.0) |
| Anti-Parkinson drugs, yes | 3,733 (16.0) | 2,694 (26.2) | 1,794 (31.1) |
| Antidepressants, yes | 6,765 (28.9) | 3,818 (37.1) | 2,315 (40.1) |
| Internal medicines, yes | 12,413 (53.1) | 6,907 (67.2) | 4,184 (72.5) |
| Internal disorder, yes, n (%) | 7,464 (31.9) | 5,119 (49.8) | 3,369 (58.4) |
| Outpatient visits, number | 12.0 (5.3) | 12.6 (5.1) | 12.7 (5.1) |
| Hospital admission, n (%) | | | |
| Any departments, yes | 3,197 (13.7) | 982 (9.5) | 533 (9.2) |
| Psychiatry, yes | 1,928 (8.2) | 642 (6.2) | 359 (6.2) |
| Blood tests, number | 0.2 (1.0) | 0.2 (1.1) | 0.2 (1.2) |
| Leave of absence, yes | 576 (2.5) | 655 (6.4) | 376 (6.5) |

**Notes:** Data are expressed as mean (standard deviation) unless otherwise stated.

# **Supplementary Table 5.** PDC for subgroups of patients with BD (stratified by baseline demographic and clinical characteristics) prescribed target drugs during the first, second, and third year of follow-up.

|  | **First year** | | **Second year** | | **Third year** | |
| --- | --- | --- | --- | --- | --- | --- |
|  | ***n*** | **Mean (SD)** | ***n*** | **Mean (SD)** | ***n*** | **Mean (SD)** |
| **Subgroups of patients with BD prescribed target drugs** | | | | | | |
| Age, years |  |  |  |  |  |  |
| <30 | 2,457 | 0.49 (0.37) | 531 | 0.70 (0.32) | 219 | 0.71 (0.32) |
| 30 to <40 | 3,002 | 0.58 (0.37) | 986 | 0.74 (0.31) | 488 | 0.77 (0.29) |
| 40 to <65 | 6,055 | 0.66 (0.36) | 2,731 | 0.79 (0.27) | 1,658 | 0.81 (0.27) |
| ≥65 | 148 | 0.73 (0.33) | 60 | 0.87 (0.24) | 40 | 0.84 (0.22) |
| Sex |  |  |  |  |  |  |
| Female | 5,398 | 0.58 (0.37) | 1,811 | 0.75 (0.30) | 946 | 0.79 (0.28) |
| Male | 6,264 | 0.63 (0.36) | 2,497 | 0.78 (0.28) | 1,459 | 0.79 (0.27) |
| Hospital admission (any departments) | | | | | | |
| No | 11,442 | 0.61 (0.37) | 4,262 | 0.76 (0.29) | 2,389 | 0.79 (0.28) |
| Yes | 220 | 0.65 (0.37) | 46 | 0.83 (0.26) | 16 | 0.81 (0.30) |
| Hospital admission (psychiatry) | | | | | | |
| No | 11,502 | 0.61 (0.37) | 4,280 | 0.76 (0.29) | 2,393 | 0.79 (0.28) |
| Yes | 160 | 0.70 (0.34) | 28 | 0.86 (0.23) | 12 | 0.77 (0.33) |
| Comorbidity scorea |  |  |  |  |  |  |
| 0 | 9,401 | 0.60 (0.37) | 3,429 | 0.76 (0.29) | 1,867 | 0.79 (0.28) |
| ≥1 | 2,261 | 0.64 (0.37) | 879 | 0.79 (0.27) | 538 | 0.81 (0.27) |
| Member status |  |  |  |  |  |  |
| Member's dependents | 3,954 | 0.59 (0.38) | 1,388 | 0.76 (0.30) | 751 | 0.79 (0.29) |
| Member | 7,708 | 0.62 (0.37) | 2,920 | 0.77 (0.28) | 1,654 | 0.79 (0.27) |
| Leave of absence |  |  |  |  |  |  |
| No | 11,256 | 0.60 (0.37) | 4,126 | 0.76 (0.29) | 2,349 | 0.79 (0.28) |
| Yes | 406 | 0.66 (0.37) | 182 | 0.78 (0.28) | 56 | 0.79 (0.29) |
| Depression |  |  |  |  |  |  |
| No | 5,374 | 0.59 (0.37) | 2,192 | 0.74 (0.30) | 1,226 | 0.78 (0.28) |
| Yes | 6,288 | 0.62 (0.37) | 2,116 | 0.79 (0.27) | 1,179 | 0.81 (0.27) |
| Prescription |  |  |  |  |  |  |
| Antidepressants |  |  |  |  |  |  |
| No | 6,018 | 0.56 (0.38) | 2,280 | 0.73 (0.30) | 1,298 | 0.76 (0.30) |
| Yes | 5,644 | 0.66 (0.36) | 2,028 | 0.80 (0.26) | 1,107 | 0.83 (0.25) |
| Benzodiazepine drugs | | | | | | |
| No | 4,004 | 0.55 (0.37) | 1,725 | 0.69 (0.31) | 949 | 0.71 (0.31) |
| Yes | 7,658 | 0.64 (0.36) | 2,583 | 0.82 (0.25) | 1,456 | 0.85 (0.24) |
| Anti-Parkinson drugs | | | | | | |
| No | 11,348 | 0.60 (0.37) | 4,149 | 0.76 (0.29) | 2,295 | 0.79 (0.28) |
| Yes | 314 | 0.77 (0.32) | 159 | 0.88 (0.20) | 110 | 0.89 (0.21) |
| Internal medicines | | | | | | |
| No | 4,652 | 0.57 (0.37) | 2,034 | 0.71 (0.31) | 1,110 | 0.73 (0.30) |
| Yes | 7,010 | 0.63 (0.37) | 2,274 | 0.81 (0.26) | 1,295 | 0.84 (0.24) |
| Internal disorder |  |  |  |  |  |  |
| No | 8,961 | 0.58 (0.37) | 3,194 | 0.75 (0.30) | 1,681 | 0.77 (0.29) |
| Yes | 2,701 | 0.68 (0.36) | 1,114 | 0.82 (0.25) | 724 | 0.83 (0.25) |

**Notes:** Target drugs (mood stabilizers, atypical antipsychotics, and typical antipsychotics) are listed in Supplementary Table 1.

aComorbidity score was calculated based on the Charlson Comorbidity Index but excluded AIDS/HIV (Quan et al., 2005) due to the unavailability of data.

**Abbreviations:** BD, bipolar disorder; SD, standard deviation; PDC, proportion of days covered.
